# Supplementary material for: Population Structure and Genetic Diversity among Isolates of Coccidioides posadasii in Venezuela and Surrounding Regions
Source: PubMed Central journal article supplement (PMC6879716; doi:10.1128/mbio.01976-19), 2019-11-26

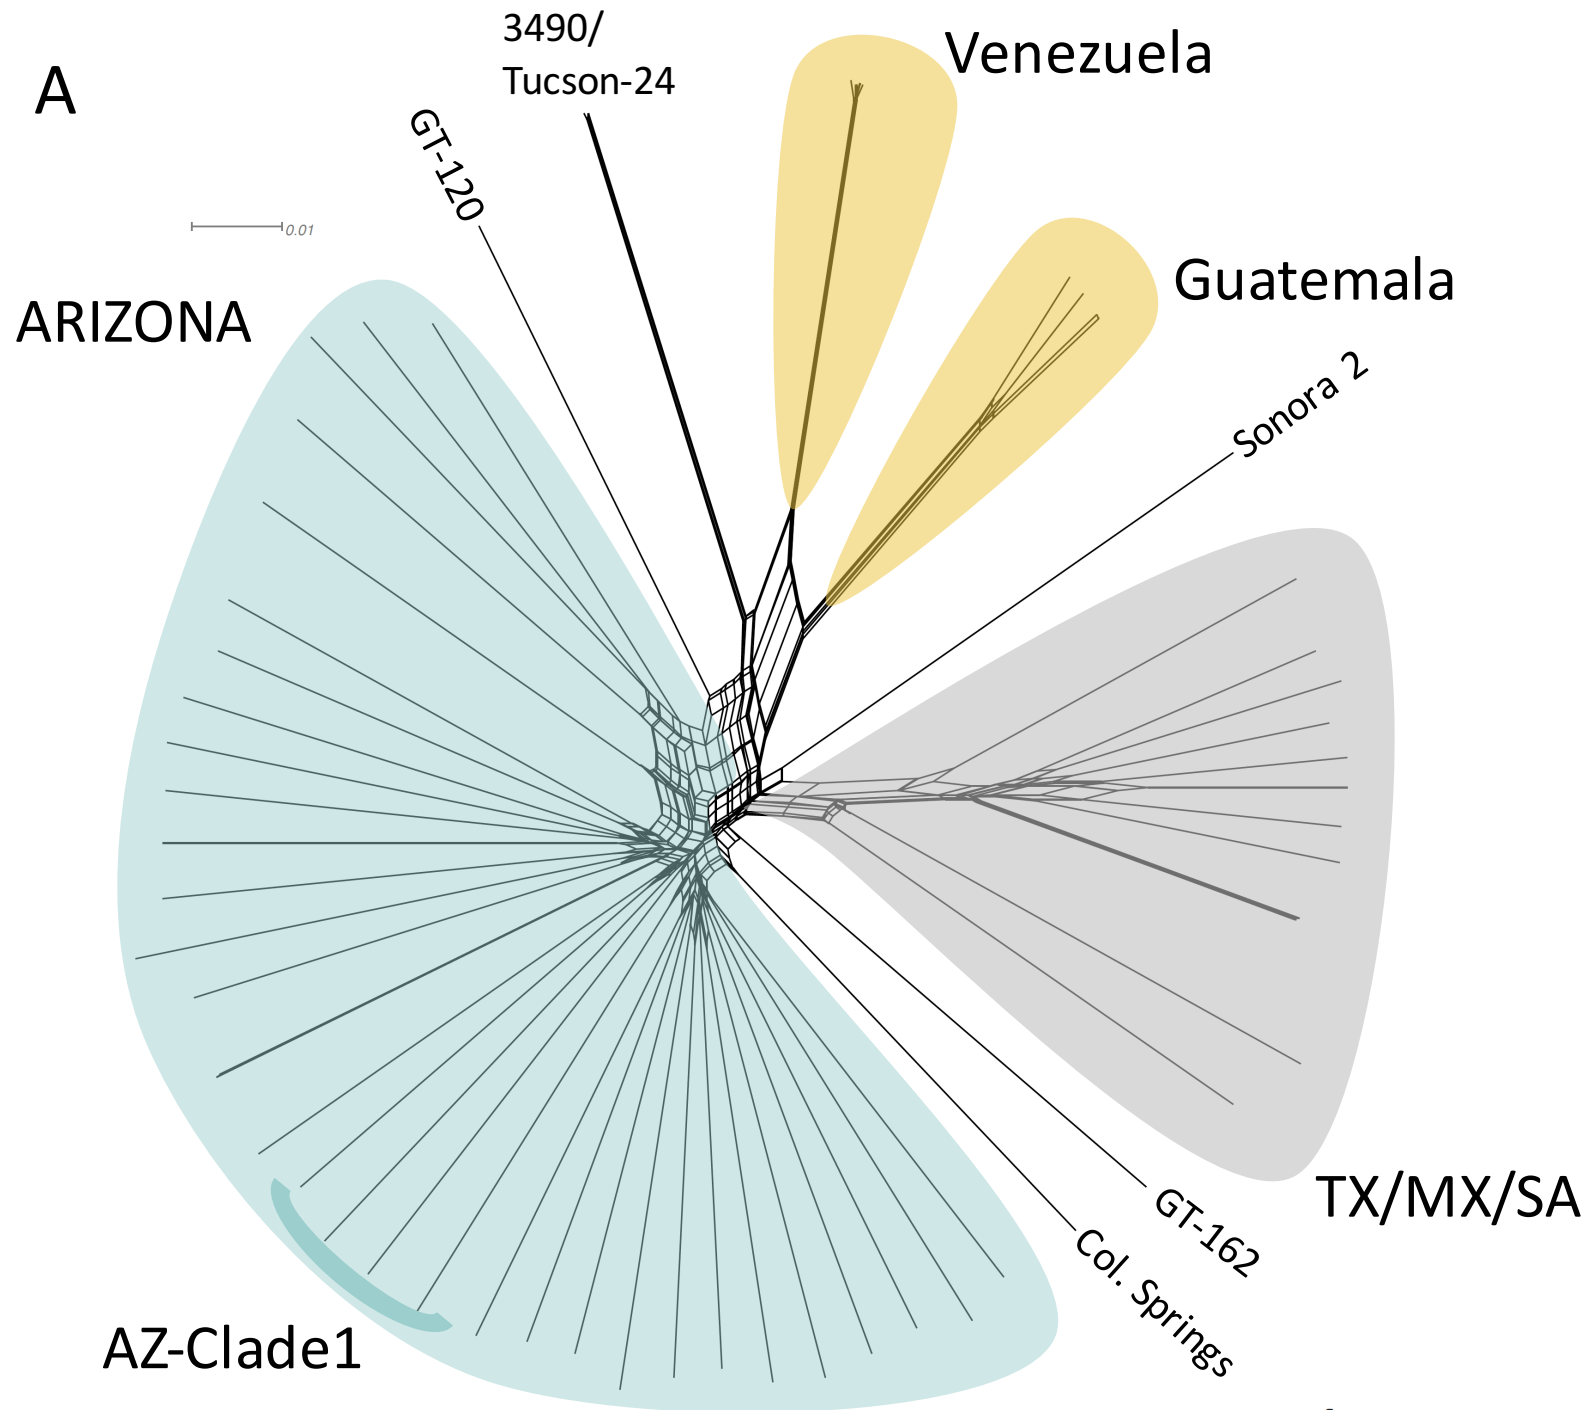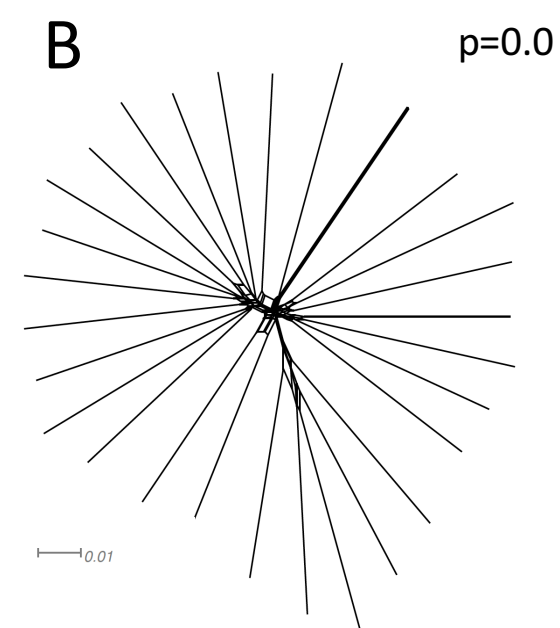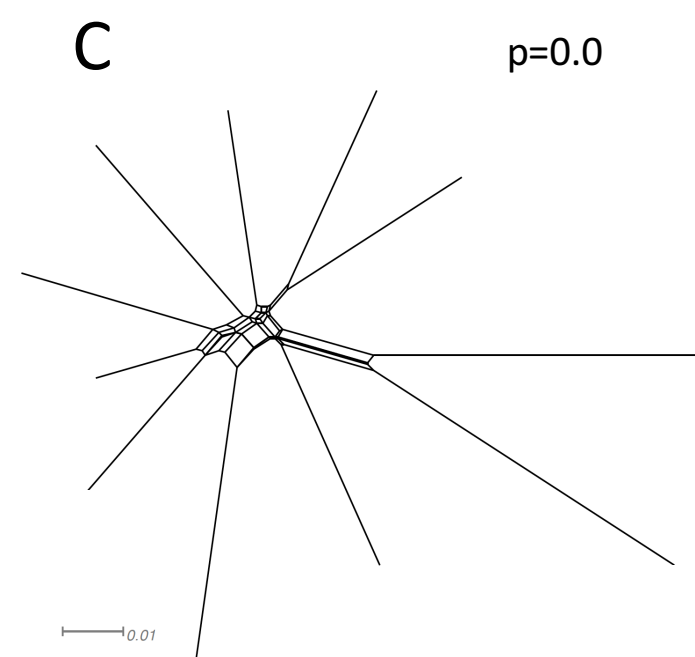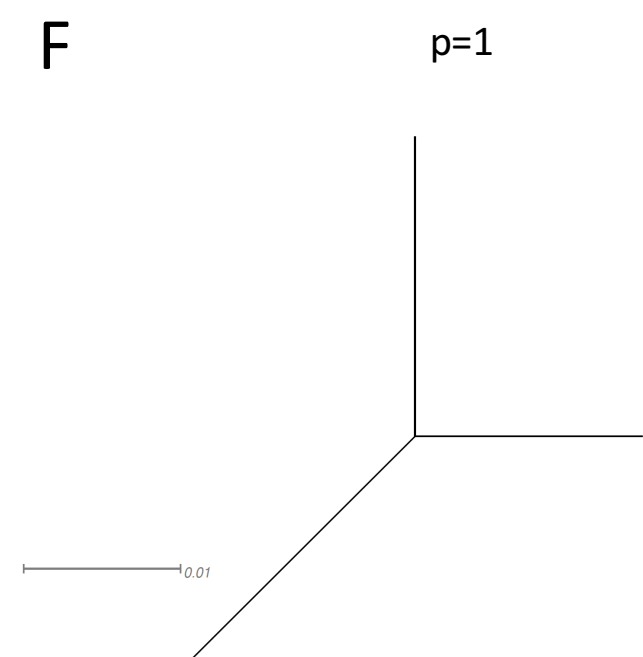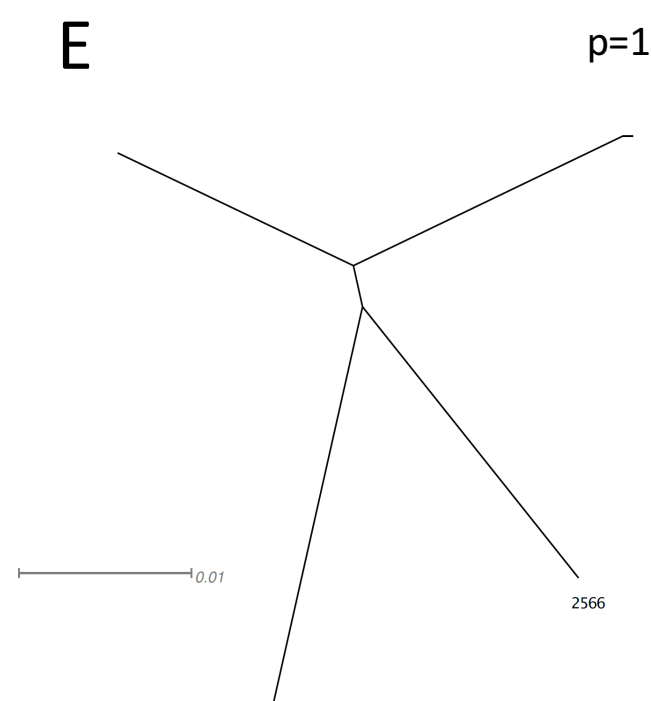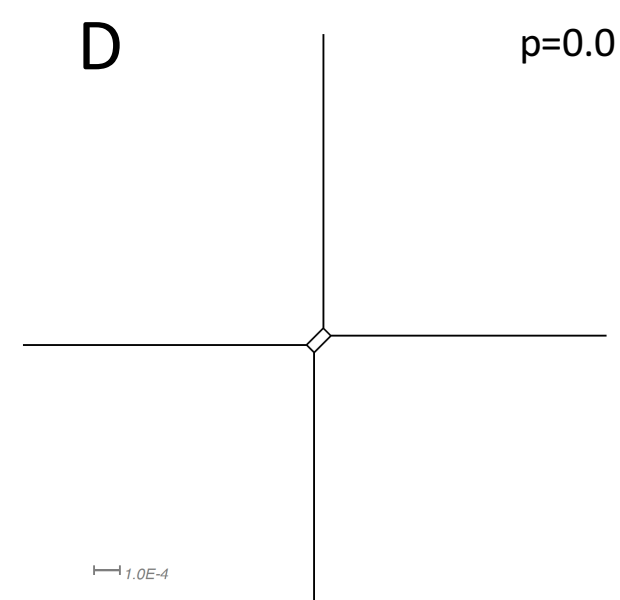

Supplement: mBio.01976-19-sf001.pdf [file mBio.01976-19-sf001.pdf]
